# Supplementary material for: Structural and Thermal Analysis of Softwood Lignins from a Pressurized Hot Water Extraction Biorefinery Process and Modified Derivatives
Source: MDPI journal article supplement (doi:10.3390/molecules24020335), 2019-01-18
Supplement: s1 [file s1]

# Thermal and Structural Analysis of Softwood Lignin from a Pressurized Hot Water Extraction Biorefinery Process and Their Modified Derivatives

## Supporting data

### Content:

- Figure S1. HSQC of acetylated birch lignin
- Figure S2. HSQC of acetylated pine lignin
- Figure S3. HSQC of acetylated spruce lignin
- Figure S4. HSQC of partially methylated birch lignin
- Figure S5. HSQC of partially methylated pine lignin
- Figure S6. HSQC of partially methylated spruce lignin
- Figure S7. HSQC of fully methylated pine lignin
- Figure S8.  $^{31}\text{P}$  NMR of the BLN softwood lignin and MWL
- Figure S9.  $^{31}\text{P}$  NMR of the partially methylated BLN lignin
- Figure S10.  $^{31}\text{P}$  NMR of the fully methylated BLN pine lignin
- Figure S11.  $^{31}\text{P}$  NMR of the acetylated BLN lignin
- Figure S12.  $^{31}\text{P}$  NMR of the softwood lignin fractions besides the BLN lignin (MTBE insoluble)
- Figure S13.  $^{13}\text{C}$  NMR of pine BLN and MWL
- Figure S14.  $^{13}\text{C}$  NMR of spruce BLN and MWL
- Figure S15.  $^{13}\text{C}$  NMR of acetylated spruce and pine BLN lignin
- Figure S16. TGA of unmodified pine lignin and acetylated pine lignin

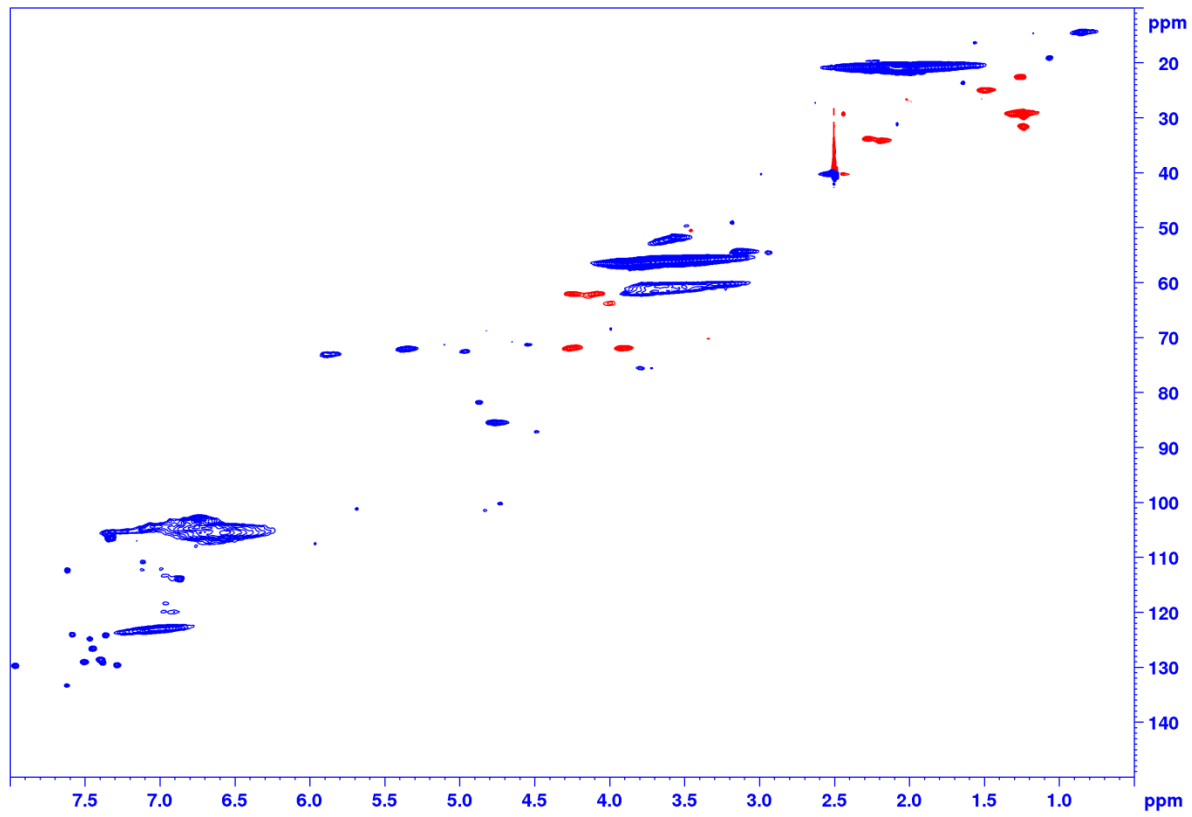

**Figure S1.** Multiplicity edited HSQC of acetylated birch lignin

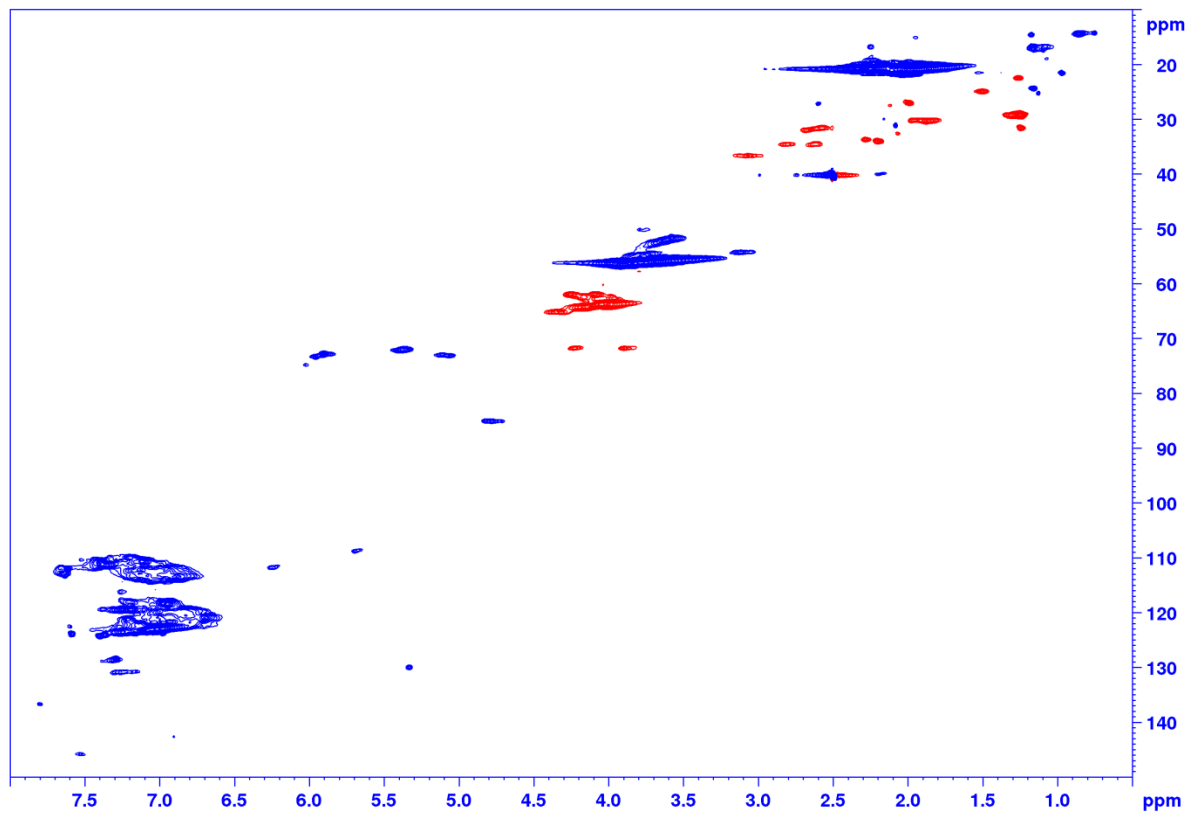

**Figure S2.** Multiplicity edited HSQC of acetylated pine lignin

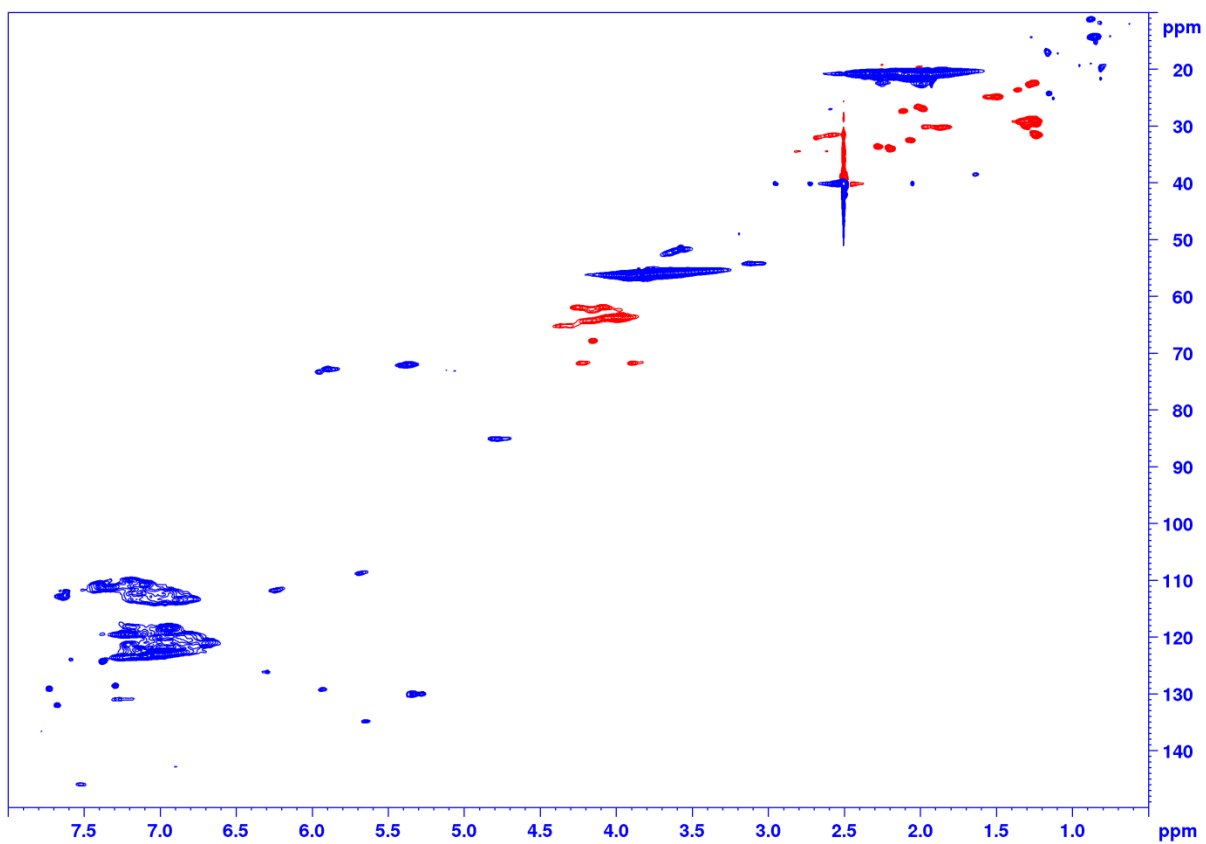

**Figure S3.** Multiplicity edited HSQC of acetylated spruce lignin

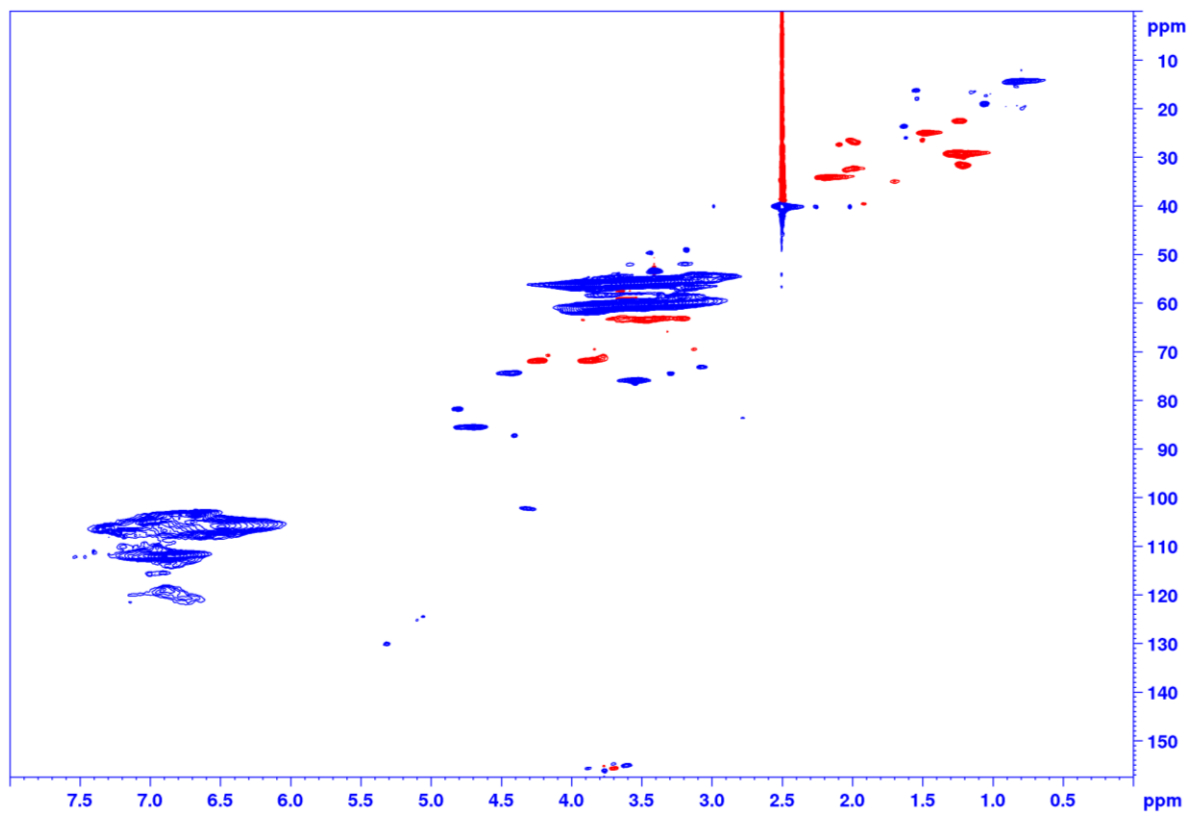

**Figure S4.** Multiplicity edited HSQC of partially methylated birch lignin

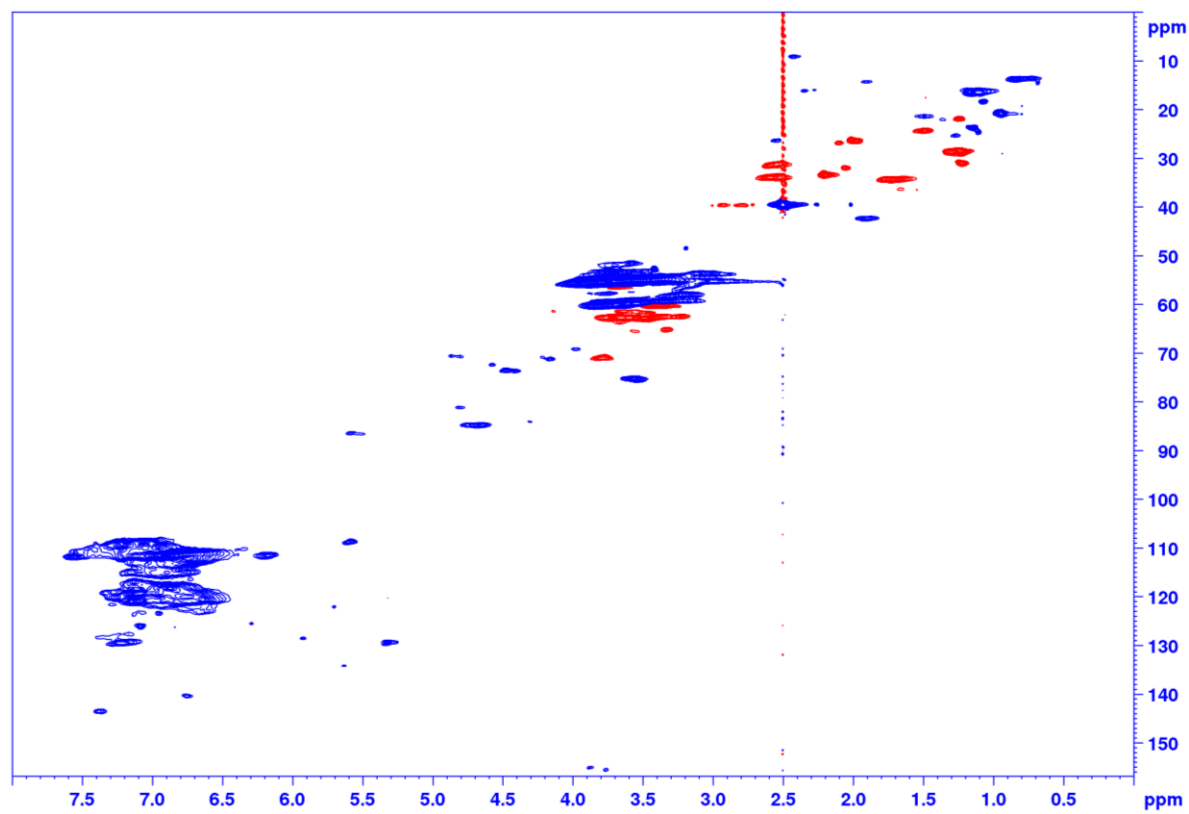

**Figure S5.** Multiplicity edited HSQC of partially methylated pine lignin

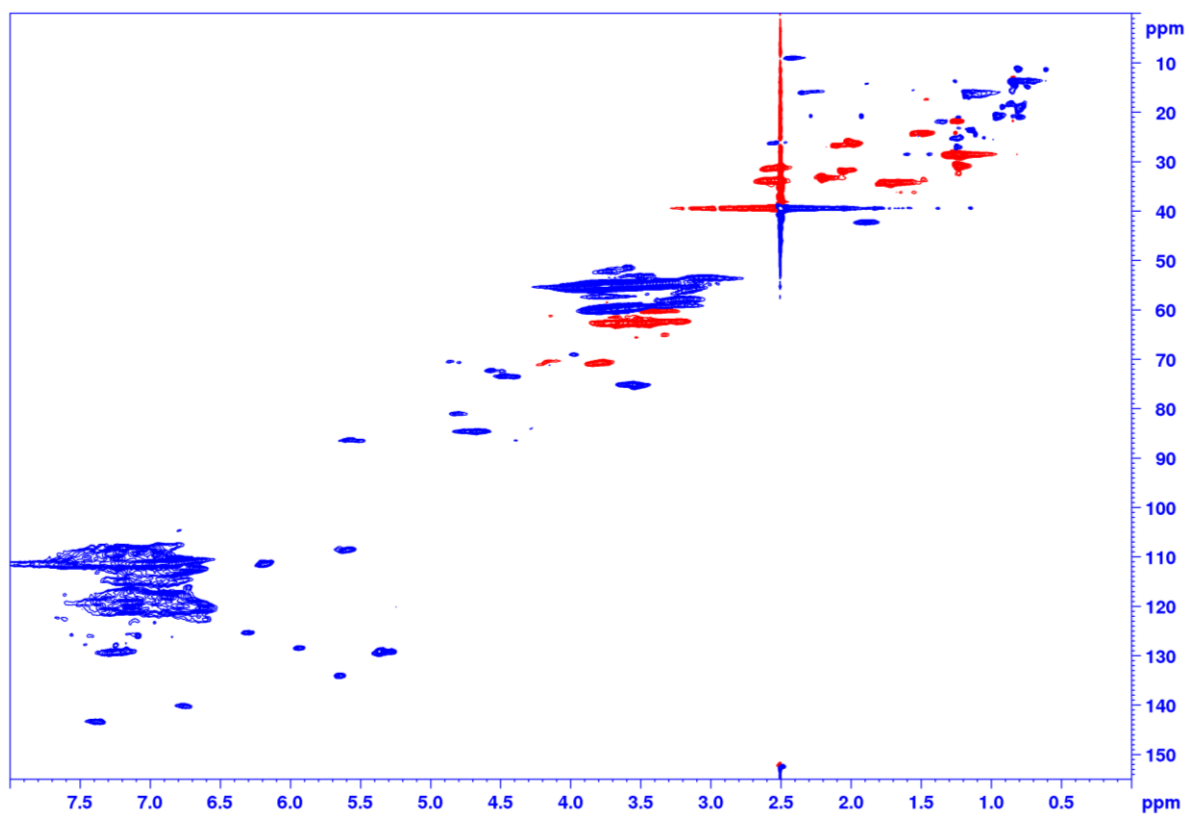

**Figure S6.** Multiplicity edited HSQC of partially methylated spruce lignin

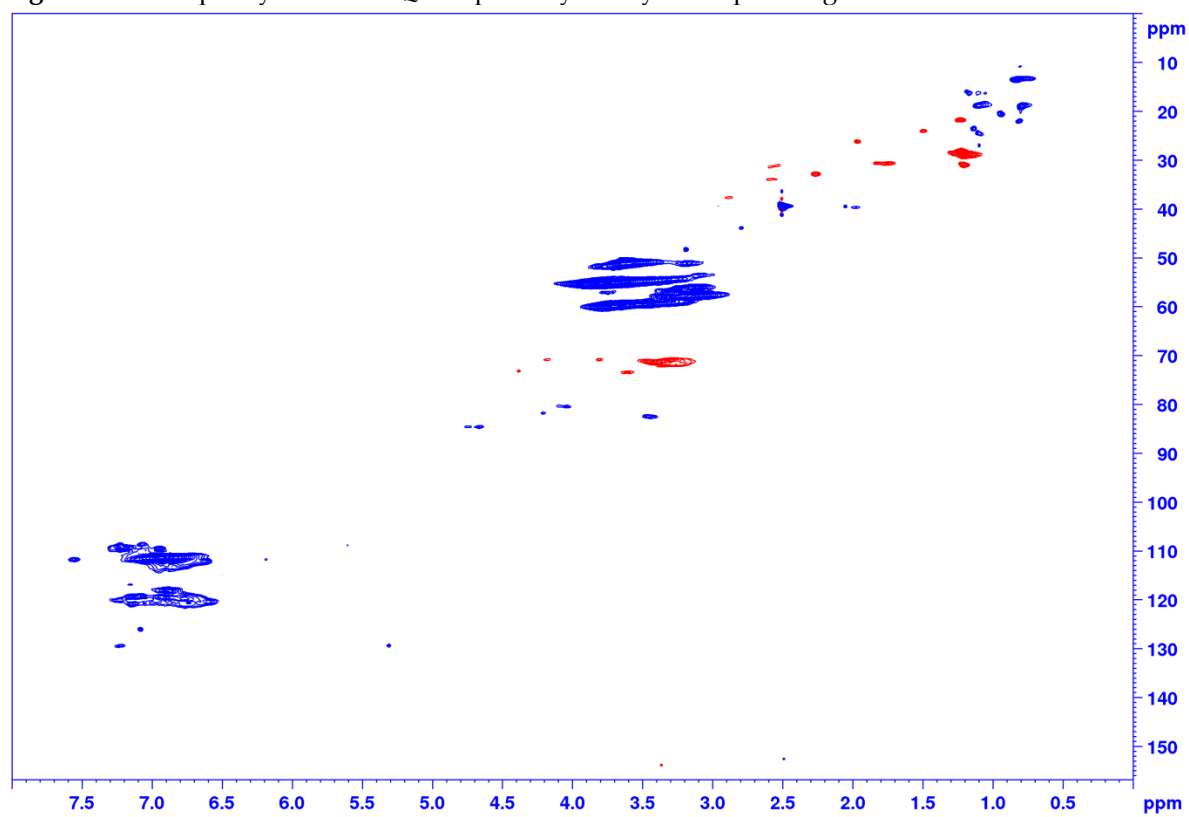

**Figure S7.** Multiplicity edited HSQC of fully methylated pine lignin

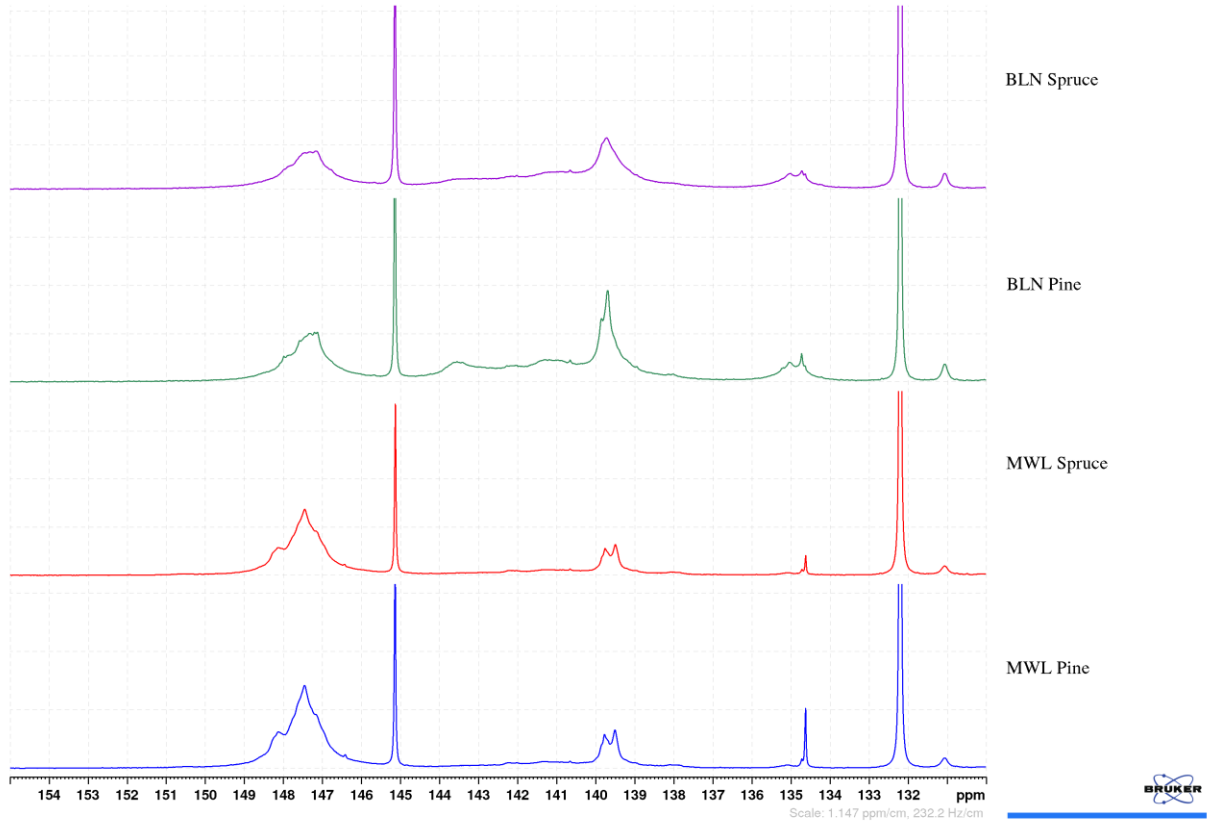

**Figure S8.**  $^{31}\text{P}$  NMR of BLN spruce, BLN pine, MWL spruce and MWL pine

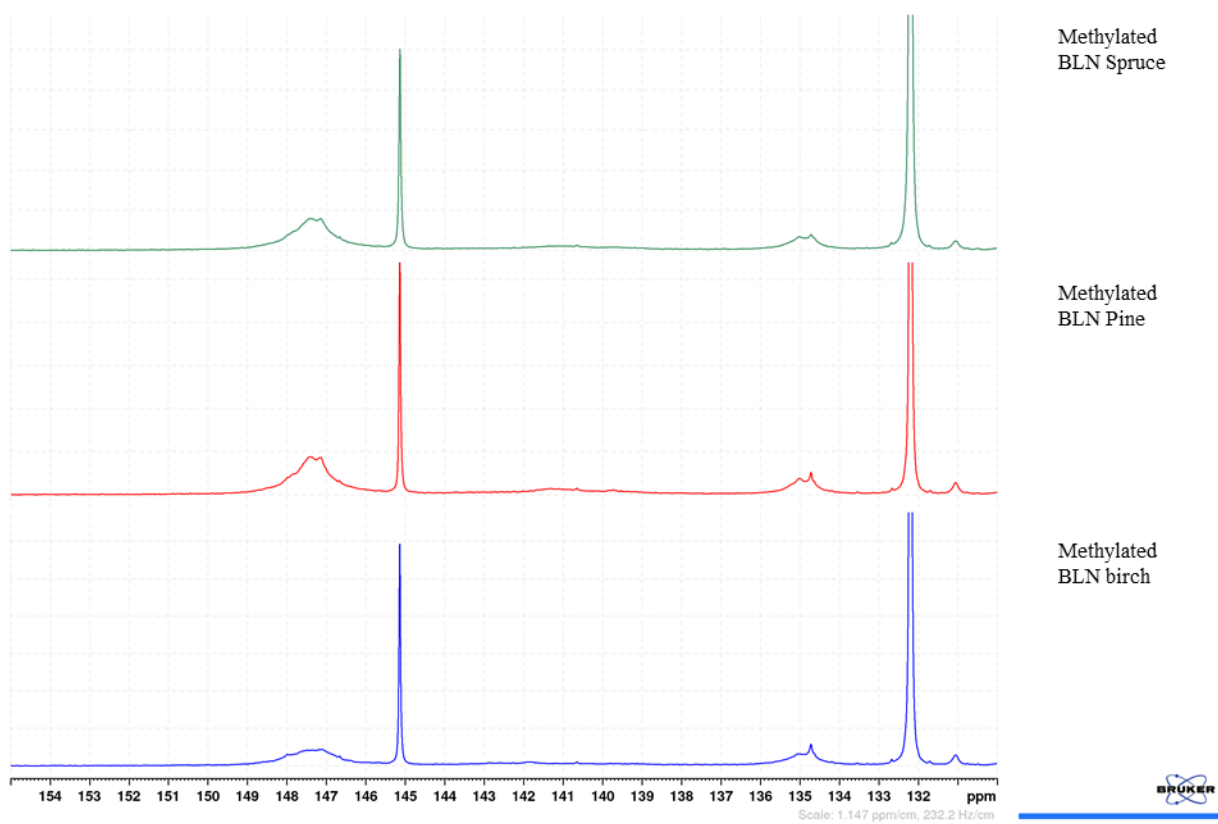

**Figure S9.**  $^{31}\text{P}$  NMR of the lignin with methylated phenolic hydroxyl groups birch, spruce and pine



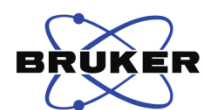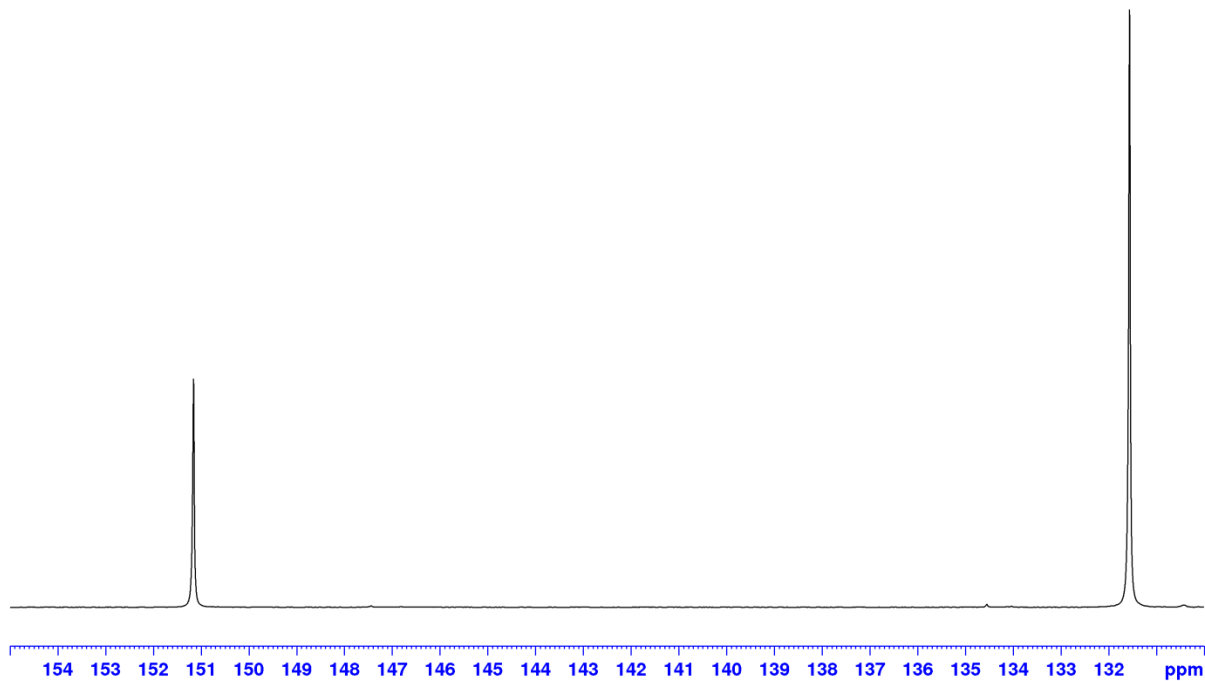

**Figure S10.**  $^{31}\text{P}$  NMR of pine lignin fully methylated

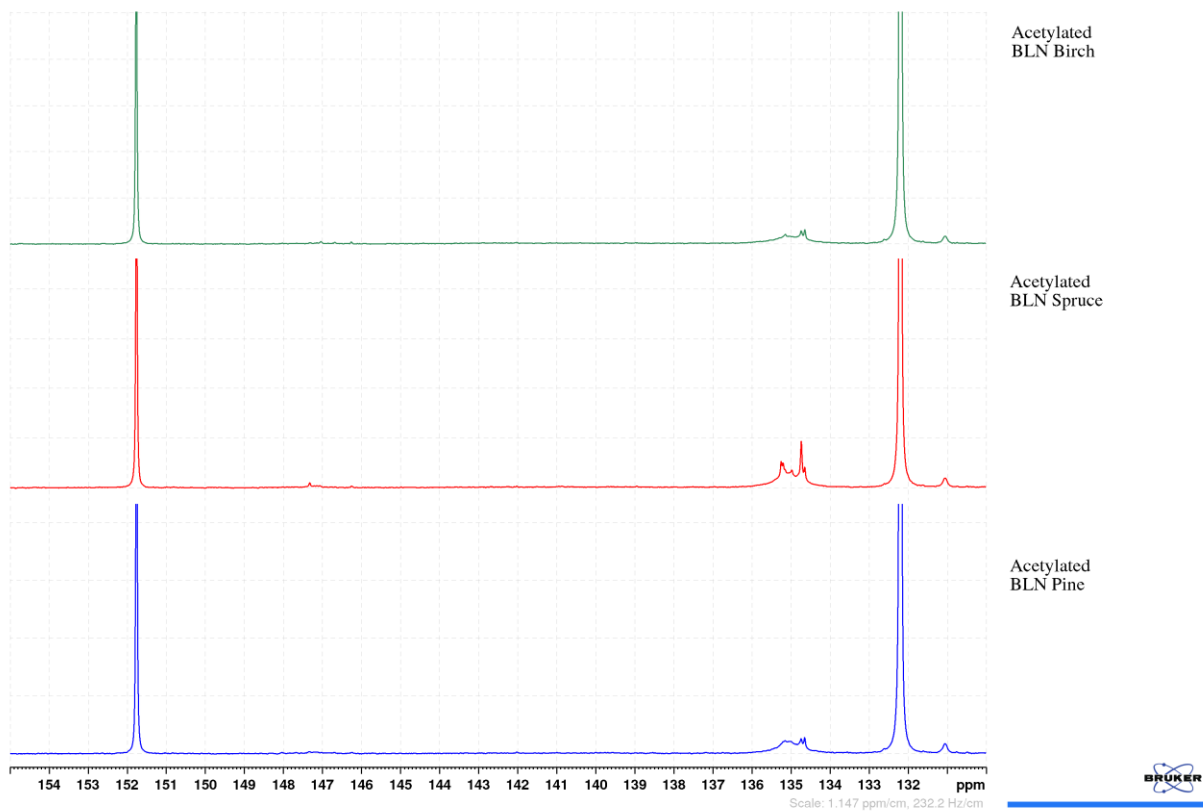

**Figure S11.**  $^{31}\text{P}$  NMR of the acetylated lignin birch, spruce and pine

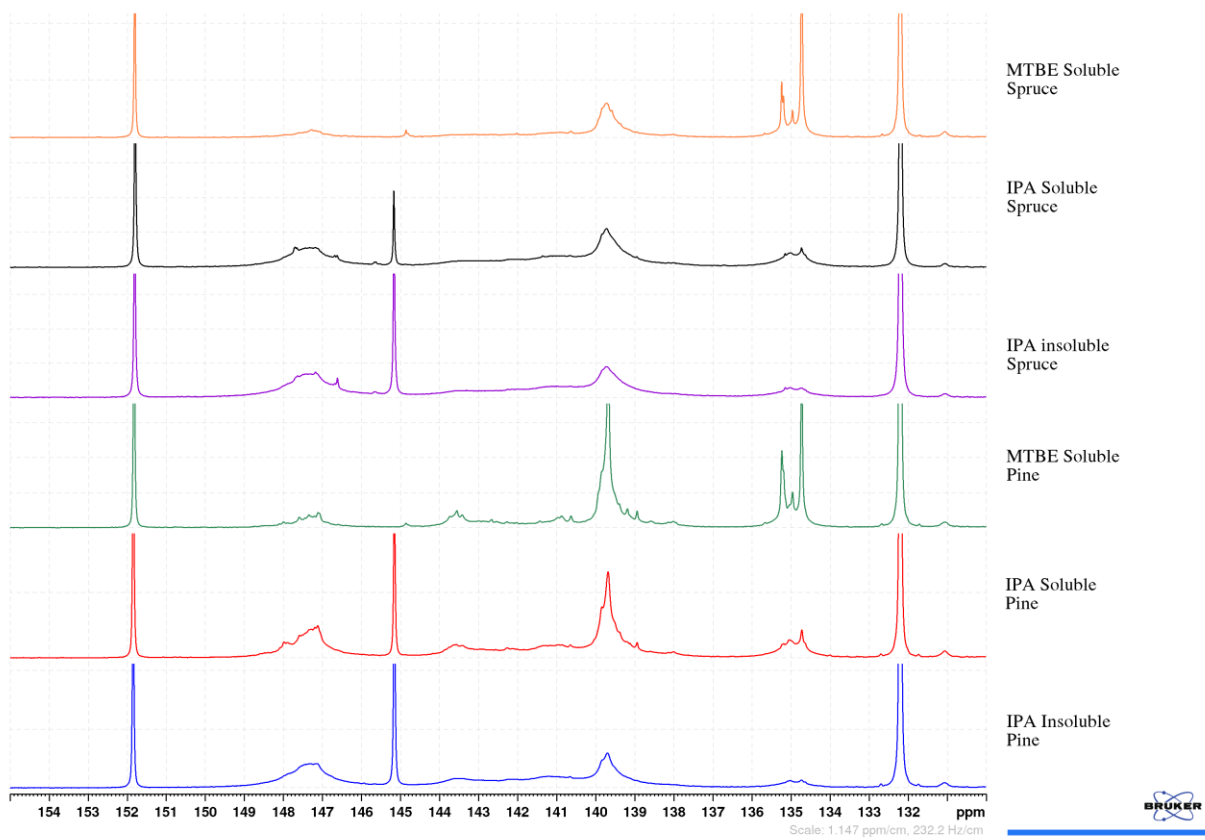

**Figure S12.**  $^{31}\text{P}$  NMR of the different lignin fractions: birch, MTBE soluble spruce, IPA soluble spruce, IPA insoluble spruce, MTBE soluble pine, IPA soluble pine and IPA insoluble pine

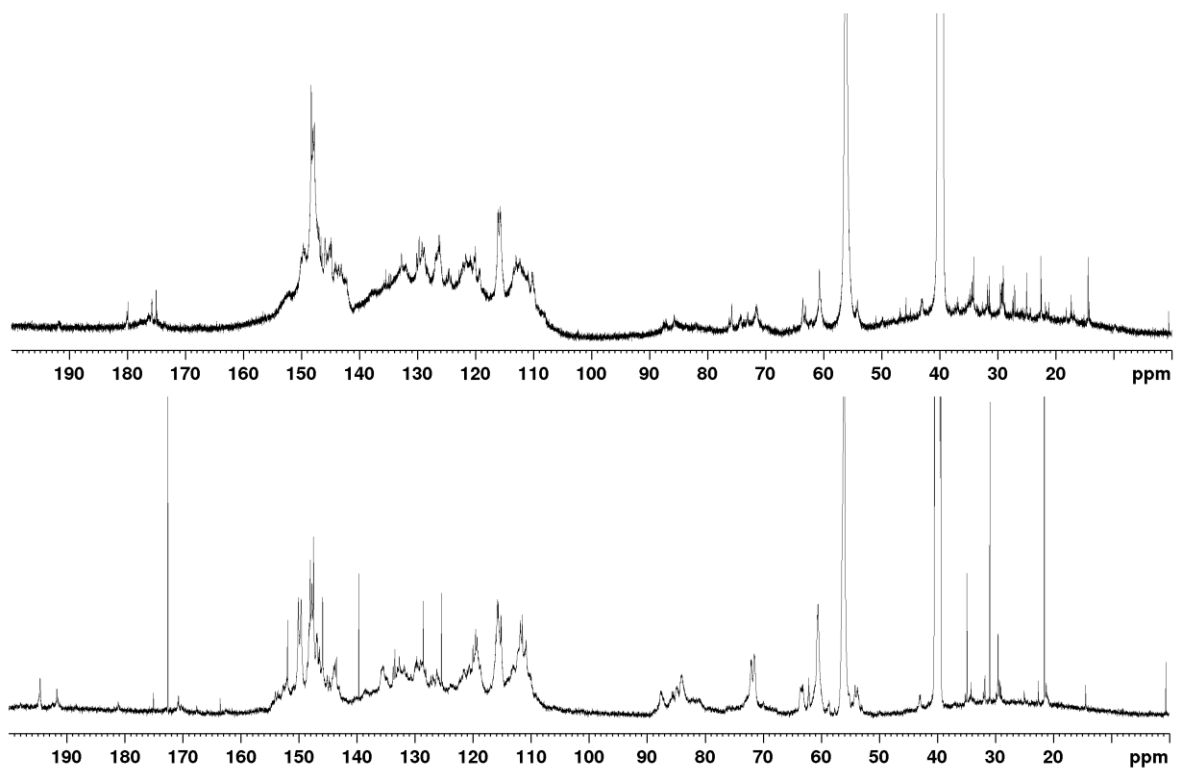

**Figure S13.**  $^{13}\text{C}$  NMR of pine, BLN (top), MWL (down)

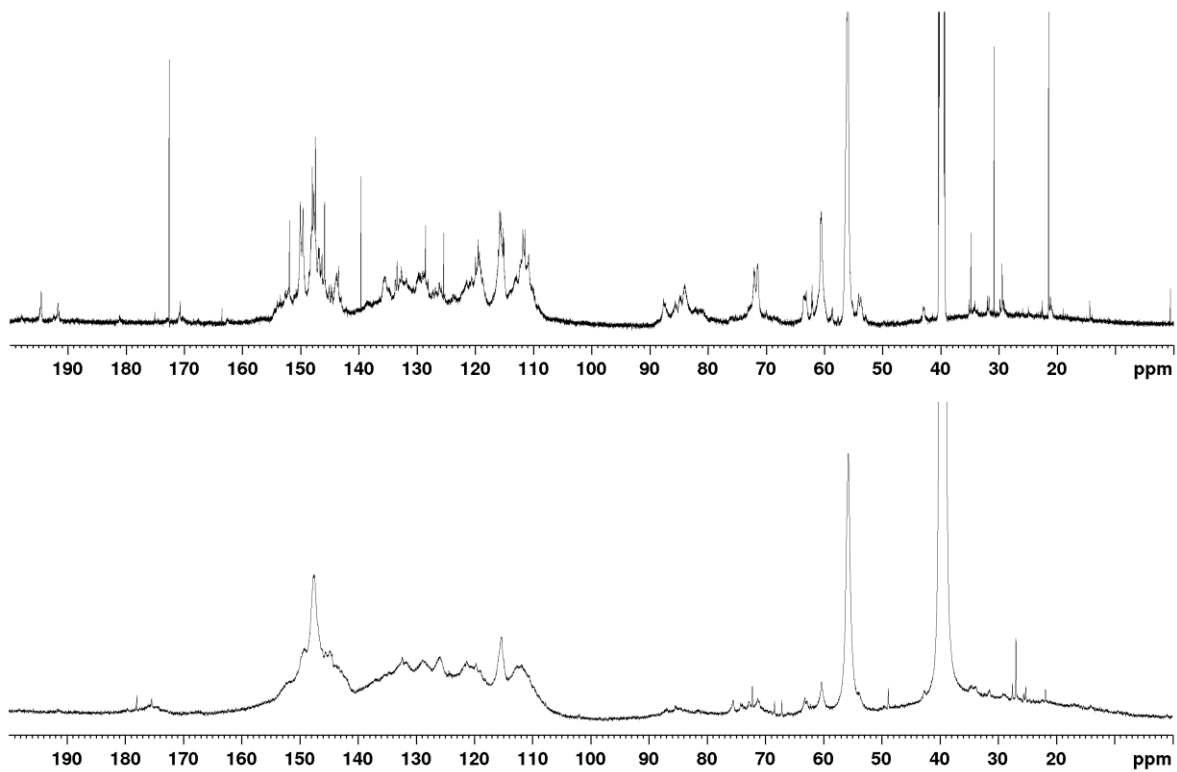

**Figure S14.**  $^{13}\text{C}$  NMR of spruce, BLN (top), MWL (down)

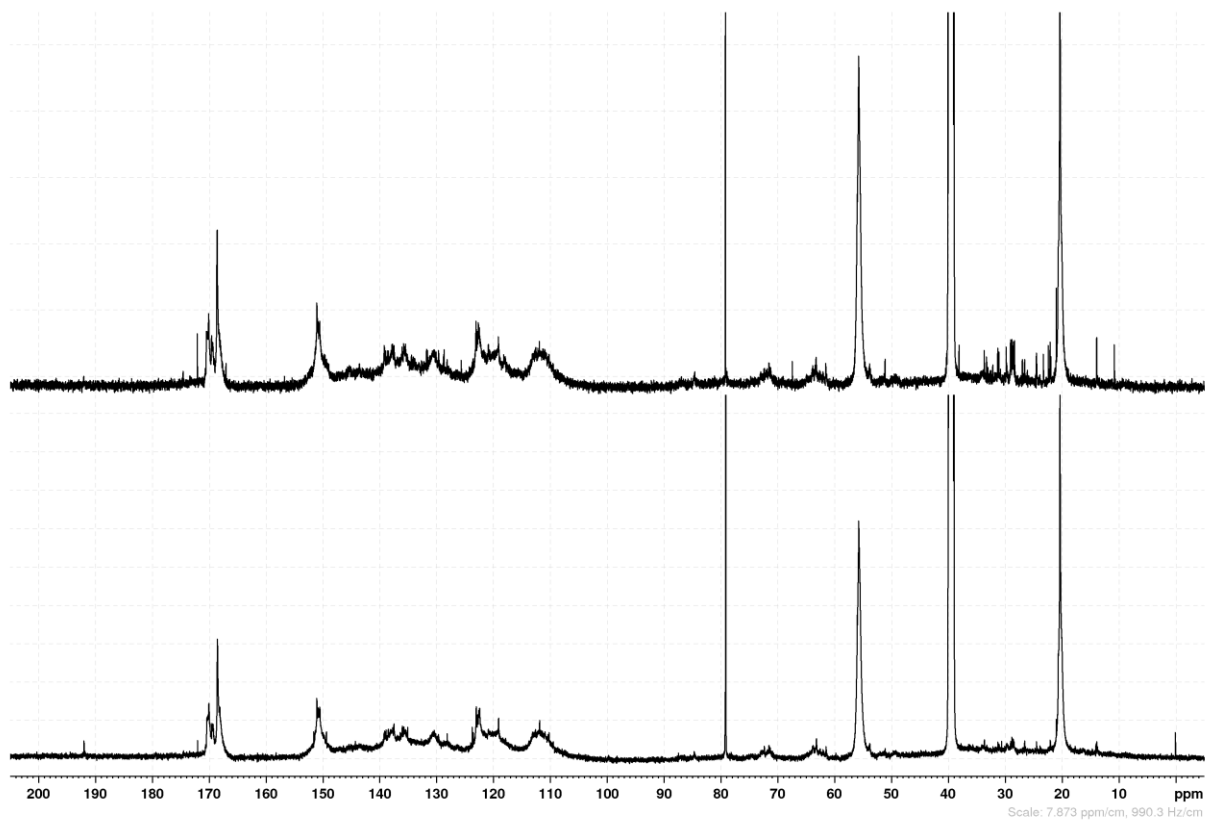

**Figure S15.** <sup>13</sup>C NMR of acetylated BLN lignin spruce (top) and pine (down)

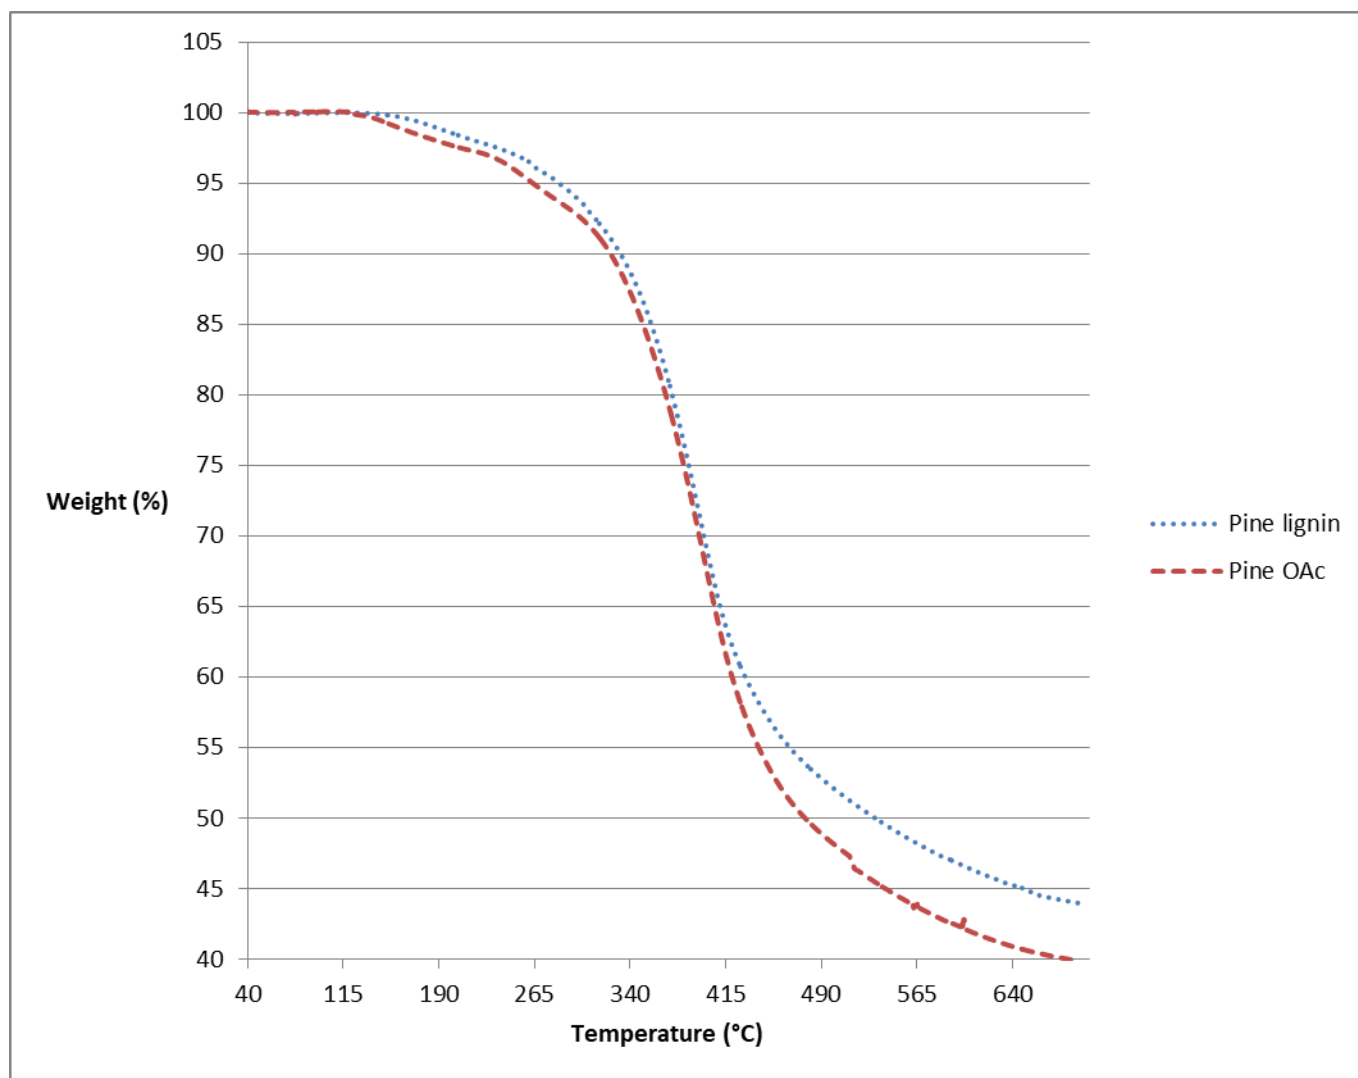

**Figure S16.** TGA of pine lignin and acetylated pine lignin after extensive drying
